# Supplementary material for: Legume intake and cancer risk in a network of case-control studies
Source: Research Square preprint supplement (doi:10.21203/rs.3.rs-2398023/v1), 2023-02-14
Supplement: Supplementary file 1 [file 419ff64ca7de48be62bc5c00.docx]

**Online Supplement Table S1**. Percentage of missing values for the covariates used in the regression models by cancer site.

|  | Oral cavity | Esophagus | Stomach | Colorectum | Larynx | Breast | Endometrium | Ovary | Prostate | Kidney |
| --- | --- | --- | --- | --- | --- | --- | --- | --- | --- | --- |
| Sex | 0 | 0 | 0 | 0 | 0 | 0 | 0 | 0 | 0 | 0 |
| Education | 0.3 | 0.2 | 0.9 | 0 | 0.1 | 0.7 | 0 | 0.9 | 0.7 | 0.4 |
| Smoking | 0 | 0 | 0 | 0.1 | 0.1 | 0.1 | 0.1 | 0.1 | 0 | 0 |
| Alcohol | 0 | 0 | 0 | 0 | 0 | 0 | 0 | 0 | 0 | 0 |
| BMI | 0.4 | 0.4 | 0.8 | 0.5 | 0.1 | 0.3 | 0.4 | 0.8 | 0.3 | 0.4 |
| Raw vegetables | 0.7 | 0.4 | 5.9 | 0.8 | 0.6 | 0.8 | 1.6 | 1.5 | 0.9 | 1.0 |
| Cooked vegetables | 19.4 | 17.6 | 6.8 | 1.0 | 12.1 | 1.0 | 2.5 | 1.8 | 1.2 | 1.3 |
| Fruit | 0 | 0 | 0.4 | 0.1 | 0.1 | 0.2 | 0.1 | 0.2 | 0 | 0.1 |
| Processed meat | 3.4 | 0.2 | 42.1 | 0.1 | 0.2 | 0.1 | 2.2 | 0.2 | 0.8 | 1.3 |
| Energy | 0 | 0 | 0 | 0 | 0 | 0 | 0 | 0 | 0 | 0 |
| Menarche | . | . | . | . | . | 0.14 | 0.79 | 0.32 | . | . |
| Menopausal status | . | . | . | . | . | 06 | 1.66 | 0.21 | . | . |
| Number of children | . | . | . | . | . | 0 | 0 | 0 | . | . |
