# Supplementary material for: Legume intake and cancer risk in a network of case-control studies
Source: Research Square preprint supplement (doi:10.21203/rs.3.rs-2398023/v1), 2023-02-14
Supplement: Supplementary file 2 [file a18e983f7fe18b797fa50a89.docx]

**Online Supplement – Table S2.** Median daily intake of fibre, dried legumes, raw and cooked vegetables and fruit in cases and controls, by cancer site and sex.

|  | | Cases | | Controls | |
| --- | --- | --- | --- | --- | --- |
| Women | Men | Women | Men |
| Oral cavity | Fibre (g/day) | 17.8 | 18.8 | 20.7 | 20.6 |
| Dried legumes (g/day) | 2.9 | 2.9 | 2.9 | 2.9 |
| Raw vegetables (g/day) | 71 | 71 | 100 | 100 |
| Cooked vegetables (g/day) | 64 | 64 | 86 | 86 |
| Fruit (no. of portions/day) | 1.4 | 1.0 | 2.0 | 2.0 |
| Esophagus | Fibre (g/day) | 17.2 | 19.5 | 19.3 | 21.3 |
| Dried legumes (g/day) | 2.9 | 2.9 | 2.9 | 2.9 |
| Raw vegetables (g/day) | 71 | 71 | 100 | 100 |
| Cooked vegetables (g/day) | 86 | 57 | 107 | 64 |
| Fruit (no. of portions/day) | 1.0 | 1.0 | 2.0 | 2.0 |
| Stomach | Fibre (g/day) | 21.4 | 21.8 | 21.0 | 21.6 |
| Dried legumes (g/day) | 3.8 | 2.9 | 2.9 | 2.9 |
| Raw vegetables (g/day) | 71 | 66 | 86 | 71 |
| Cooked vegetables (g/day) | 86 | 64 | 86 | 64 |
| Fruit (no. of portions/day) | 2.0 | 2.0 | 2.0 | 2.0 |
| Colorectum | Fibre (g/day) | 21.9 | 24.2 | 21.8 | 24.7 |
| Dried legumes (g/day) | 2.9 | 2.9 | 3.8 | 3.8 |
| Raw vegetables (g/day) | 100 | 86 | 100 | 100 |
| Cooked vegetables (g/day) | 64 | 64 | 85 | 64 |
| Fruit (no. of portions/day) | 2.0 | 2.0 | 2.0 | 2.0 |
| Larynx | Fibre (g/day) | 19.4 | 20.6 | 21.3 | 22.4 |
| Dried legumes (g/day) | 2.9 | 2.9 | 2.9 | 2.9 |
| Raw vegetables (g/day) | 76 | 94 | 114 | 100 |
| Cooked vegetables (g/day) | 64 | 43 | 86 | 64 |
| Fruit (no. of portions/day) | 1.0 | 1.3 | 2.0 | 2.0 |
| Breast | Fibre (g/day) | 23.2 | . | 22.5 | . |
| Dried legumes (g/day) | 3.8 | . | 3.8 | . |
| Raw vegetables (g/day) | 100 | . | 100 | . |
| Cooked vegetables (g/day) | 71 | . | 85 | . |
| Fruit (no. of portions/day) | 2.0 | . | 2.0 | . |
| Endometrium | Fibre (g/day) | 21.5 | . | 21.5 | . |
| Dried legumes (g/day) | 2.9 | . | 2.9 | . |
| Raw vegetables (g/day) | 86 | . | 100 | . |
| Cooked vegetables (g/day) | 86 | . | 85 | . |
| Fruit (no. of portions/day) | 2.0 | . | 2.0 | . |
| Ovary | Fibre (g/day) | 22.9 | . | 21.8 | . |
| Dried legumes (g/day) | 2.9 | . | 3.8 | . |
| Raw vegetables (g/day) | 100 | . | 100 | . |
| Cooked vegetables (g/day) | 71 | . | 86 | . |
| Fruit (no. of portions/day) | 2.0 | . | 2.0 | . |
| Prostate | Fibre (g/day) | . | 23.5 | . | 23.5 |
| Dried legumes (g/day) | . | 2.9 | . | 2.9 |
| Raw vegetables (g/day) | . | 100 | . | 100 |
| Cooked vegetables (g/day) | . | 43 | . | 57 |
| Fruit (no. of portions/day) | . | 2.0 | . | 2.0 |
| Kidney | Fibre (g/day) | 21.6 | 23.5 | 21.4 | 23.4 |
| Dried legumes (g/day) | 2.9 | 2.9 | 2.9 | 2.9 |
| Raw vegetables (g/day) | 76 | 86 | 100 | 95 |
| Cooked vegetables (g/day) | 64 | 57 | 64 | 57 |
| Fruit (no. of portions/day) | 2.0 | 2.0 | 2.0 | 2.0 |
